# Supplementary material
Source: HighWire-hosted journal article supplement (https://jama.ama-assn.org/content/suppl/2009/09/15/302.6.704)
Supplement: pdfpat081209.pdf [file pdfpat081209.pdf]

# Demencia

La **demencia** es la pérdida de la capacidad intelectual, también conocida como función **cognitiva** (razonamiento). Las personas con demencia pueden estar confundidas, ser incapaces de recordar cosas, o perder capacidades que en algún momento tuvieron, incluida la capacidad de realizar actividades diarias normales. Finalmente, pueden no reconocer a los familiares o amigos y pueden comportarse en forma nerviosa. Si bien la demencia es más común en personas adultas mayores, no es una consecuencia normal del envejecimiento. El número de *JAMA* del 12 de agosto de 2009 incluye un artículo sobre los patrones alimentarios, el deterioro cognitivo y el riesgo de demencia. Esta Hoja para el Paciente surge de otra publicada anteriormente en el número de *JAMA* del 6 de junio de 2007.

## SIGNOS Y SÍNTOMAS DE LA DEMENCIA

- Aumento gradual de la pérdida de la memoria
- Confusión
- Pensamientos poco claros, incluida la pérdida de las capacidades para solucionar problemas
- Comportamiento nervioso o delirios
- Sentirse perdido en circunstancias que antes eran familiares
- Pérdida de interés en las actividades diarias o usuales

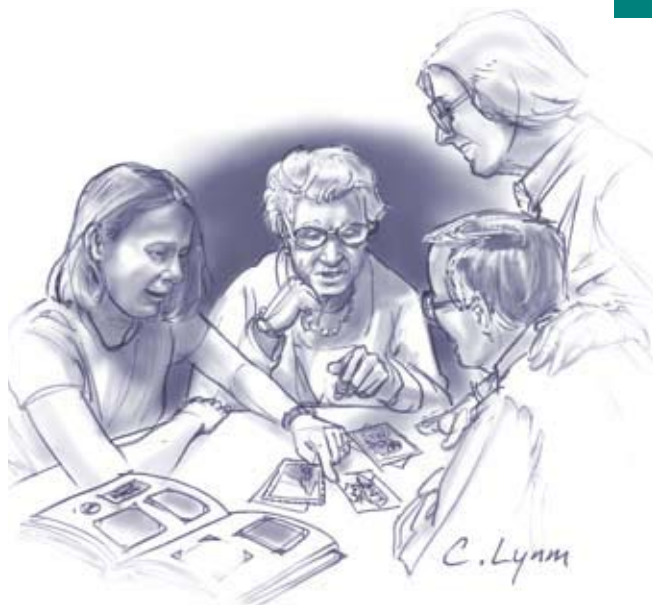

## ENFERMEDAD DE ALZHEIMER

La enfermedad de Alzheimer es la causa más común de la demencia. Las personas con enfermedad de Alzheimer pierden **neuronas** (células nerviosas) activas en áreas del cerebro que se relacionan con la función cognitiva y la memoria. También experimentan una acumulación de proteínas anormales en algunas células cerebrales. La enfermedad de Alzheimer afecta mayormente a personas adultas mayores, pero a veces puede desarrollarse en personas más jóvenes. Se desconoce la causa de la enfermedad de Alzheimer, pero los factores de riesgo incluyen antecedentes familiares, un gen específico y la edad avanzada.

## OTRAS CAUSAS DE LA DEMENCIA

La demencia vascular es provocada generalmente por accidentes cerebrovasculares durante un lapso de tiempo que afecta el flujo sanguíneo que llega a áreas del cerebro relacionadas con la memoria y el razonamiento. Algunas enfermedades neurológicas, como la **enfermedad de Parkinson** (una enfermedad cerebral que causa temblores y rigidez muscular) y la **enfermedad de Huntington** (una enfermedad hereditaria que causa movimientos anormales y demencia), pueden provocar demencia debido a sus efectos sobre el tejido cerebral. Los síntomas como los de la demencia pueden ser provocados por muchos otros factores, entre ellos medicamentos y algunas afecciones. Es importante que un médico realice una evaluación detallada para determinar las causas que pueden tratarse.

## TRATAMIENTO

El diagnóstico de la demencia puede ayudar a la persona y a sus familiares a obtener ayuda de los recursos disponibles. No existe una cura para la enfermedad de Alzheimer ni para la demencia vascular. Algunos medicamentos recetados pueden ayudar a hacer más lenta la evolución de la demencia durante el tratamiento. Su médico le puede ayudar a decidir si los medicamentos pueden ser útiles. Es posible que, algún día, las investigaciones médicas sobre la enfermedad de Alzheimer y demás demencias sean de ayuda para la prevención, la detección temprana y los tratamientos más eficaces.

## PARA OBTENER MÁS INFORMACIÓN

- National Institute on Aging (Instituto Nacional sobre el Envejecimiento)  
[www.nia.nih.gov](http://www.nia.nih.gov)
- Alzheimer's Association (Asociación sobre la Enfermedad de Alzheimer)  
[www.alz.org](http://www.alz.org)
- National Institute of Neurological Disorders and Stroke (Instituto Nacional de Trastornos Neurológicos y Accidentes Cerebrovasculares)  
[www.ninds.nih.gov](http://www.ninds.nih.gov)

## INFÓRMESE

Para encontrar esta y otras Hojas para el Paciente de *JAMA* anteriores, vaya al enlace Patient Page (Hoja para el Paciente) del sitio web de *JAMA* en [www.jama.com](http://www.jama.com). Muchas están disponibles en inglés y español. Se publicó una Hoja para el Paciente sobre la enfermedad de Alzheimer en el número del 7 de noviembre de 2001, y otra sobre el deterioro cognitivo leve en el número del 22/29 de julio de 2009.

Fuentes: National Institute on Aging, National Institute of Neurological Disorders and Stroke, Alzheimer's Association

Janet M. Torpy, MD, Redactora

Cassio Lynn, MA, Ilustrador

Richard M. Glass, MD, Editor

La Hoja para el Paciente de *JAMA* es un servicio al público de *JAMA*. La información y las recomendaciones que aparecen en esta hoja son adecuadas en la mayoría de los casos, pero no reemplazan el diagnóstico médico. Para obtener información específica relacionada con su afección médica personal, *JAMA* le sugiere que consulte a su médico. Los médicos y otros profesionales de atención médica pueden fotocopiar esta hoja con fines no comerciales, para compartirla con pacientes. Para comprar reimpresiones en grandes cantidades, llame al 312/464-0776.

**JAMA**  
COPIA PARA  
SUS PACIENTES
